# Supplementary material for: African Arowana Genome Provides Insights on Ancient Teleost Evolution
Source: PubMed Central journal article supplement (PMC7586111; doi:10.1016/j.isci.2020.101662), 2020-10-09
Supplement: mmc1.pdf [file mmc1.pdf]

**iScience, Volume 23**

## **Supplemental Information**

### **African Arowana Genome Provides**

### **Insights on Ancient Teleost Evolution**

**Shijie Hao, Kai Han, Lingfeng Meng, Xiaoyun Huang, Wei Cao, Chengcheng Shi, Mengqi Zhang, Yilin Wang, Qun Liu, Yaolei Zhang, Haixi Sun, Inge Seim, Xun Xu, Xin Liu, and Guangyi Fan**

# African arowana genome provides insights on ancient teleost evolution

Shijie Hao<sup>1,2,7</sup>, Kai Han<sup>2,7</sup>, Lingfeng Meng<sup>1,2</sup>, Xiaoyun Huang<sup>2</sup>, Wei Cao<sup>3</sup>, Chengcheng Shi<sup>1,2</sup>, Mengqi Zhang<sup>2</sup>, Yilin Wang<sup>2</sup>, Qun Liu<sup>2</sup>, Yaolei Zhang<sup>2,5</sup>, Haixi Sun<sup>3</sup>, Inge Seim<sup>6</sup>, Xun Xu<sup>2,3</sup>, Xin Liu<sup>2,3,4,\*</sup>, Guangyi Fan<sup>2,3,4,8,\*</sup>.

<sup>1</sup>BGI Education Center, University of Chinese Academic of Sciences, Shenzhen 518083, China

<sup>2</sup>BGI-Qingqao, BGI-Shenzhen, Qingdao, 266555, China.

<sup>3</sup>BGI-Shenzhen, Shenzhen 518083, China.

<sup>4</sup>State Key Laboratory of Agricultural Genomics, BGI-Shenzhen, Shenzhen 518083, China.

<sup>5</sup>Department of Biotechnology and Biomedicine, Technical University of Denmark, Lyngby, 2800, Denmark.

<sup>6</sup>Comparative and Endocrine Biology Laboratory, Translational Research Institute-Institute of Health and Biomedical Innovation, School of Biomedical Sciences, Queensland University of Technology, Brisbane 4102, Queensland, Australia.

<sup>7</sup>These authors contributed equally.

<sup>8</sup>Lead Contact

\*Correspondence: [liuxin@genomics.cn](mailto:liuxin@genomics.cn) (X.L.), [fanguangyi@genomics.cn](mailto:fanguangyi@genomics.cn) (G.F.).

## Transparent Methods

### Sample collection, library construction and genome sequencing

An individual African arowana fish from a seafood market at Xiamen, Fujian province, southeast China was collected and the muscle tissues were used for DNA extraction using the conventional salting-out method. The high molecular weight genomic DNA with an average length of 50 Kb was further used to construct a single tube Long Fragment Read (stLFR) library using the MGIEasy stLFR Library Prep kit (PN: 1000005622) according to the instructions(Wang et al., 2019). Hi-C library was constructed following the Wang's methods(Wang et al., 2019) with whole blood tissue of the same individual. The sequencing was conducted on a BGISEQ-500 platform with pair-end 100 bp read length. Besides, one nanopore library was also prepared according to the instructed protocol using the Oxford Nanopore SQK-LSK109 kit and sequenced on GridIon X5 platform.

### Genome survey

The  $k$ -mer frequencies within the clean stLFR reads were analyzed to estimate the major genome

characteristics. The occurrences of all 17-mers within both strands were counted using jellyfish v2.2.7(Marcais and Kingsford, 2011), and the genome size, heterozygosity as well as repeat content were calculated using GenomeScope (Vurture et al., 2017). The modeling distribution of 17-mer frequency demonstrated a peak at around 52, with 41,344,762,649 total number of  $k$ -mers. The estimated haploid genome size was 673.41Mb, of which 31% was inferred to be repeat, a low heterozygosity rate (0.13%) was detected while the  $k$ -mer distribution showed no apparent peak indicated heterozygosity in this genome.

### ***De novo* genome assembly**

Draft genome sequence was first assembled using Supernova v2.1.1(Weisenfeld et al., 2017) software and processed with one round of gap-closing using Gapcloser v1.12(Luo et al., 2012) with stLFR data. In this process, the stLFR reads were first pre-processed to be compatibly handled by supernova assembler, using the stLFR2Supernova pipeline ([https://github.com/BGI-Qingdao/stlfr2supernova\\_pipeline](https://github.com/BGI-Qingdao/stlfr2supernova_pipeline)). Then, we enhanced the draft assembly using TGS-GapCloser pipeline (Xu et al., 2019) based on the single molecular long reads.

Hi-C data were used to improve the connection integrity of the scaffolds. We first detected all valid pairs of reads using Hic-Pro v2.8.0(Servant et al., 2015) by mapping clean Hi-C reads to draft genome sequences, and the valid read pairs were extracted and aligned to the genome using Juicer v1.5(Durand et al., 2016b). Then the assembled fragments of DNA were ordered and oriented using 3D-DNA pipeline(Dudchenko et al., 2017) based on the Juicer Hi-C contacts ('merged\_nodups.txt' file). Manual review and refinement were also performed by using Juicebox Assembly Tools v1.9.0(Durand et al., 2016a) to identify and remove the remaining assembly errors.

### **Genome annotation**

We firstly detected and annotated the repetitive sequences in the genomes. For the annotation of TRFs, Tandem Repeats Finder v 4.04 program(Benson, 1999) was employed. The TEs were annotated by a combination of both *de novo* prediction and homology-based identification. Briefly, the genome sequences were *de novo* searched using LTR\_Finder(Xu and Wang, 2007) and RepeatModeler(Smit et al., 2019) to find sequence elements with specific consensus models of putative interspersed repeats. The non-redundant self-contained repeat library was then searched against the genome using RepeatMasker (<http://www.repeatmasker.org/>). In the homology-based

detection, the genome sequences were aligned to both the public Repbase 21.01 and transposable element protein database (included in the RepeatMasker package) to detect interspersed repeats. Evidences including the results of ab initio gene predictors and homologous gene models to proteins previously discovered in other sequenced genomes, as well as transcript sequences were integrated to make a comprehensive gene structure annotation. The Augustus (Stanke et al., 2006), GlimmerHMM (Majoros et al., 2004) and Genescan (Burge and Karlin, 1997) were applied for ab initio gene finding with best parameters trained for zebrafish and vertebrates. For homology-based prediction, nonredundant protein sequences from 5 species (*Oreochromis niloticus*, *Pundamilia nyererei*, *Maylandia zebra*, *Astatotilapia calliptera* and *Scleropages formosus*) were aligned against African arowana genome using GeneWise v2.4.1 program (Birney et al., 2004). Furthermore, transcript sequences were constructed based on the RNA-Seq alignment to the genome that generated by using HISAT v2.1.0 (Kim et al., 2019), and candidate coding regions within the transcripts were further detected, in which ORFs with homology to known proteins were also identified via blast (against SwissProt database) and pfam searches, using TransDecoder v5.5.0 (<https://transdecoder.github.io/>). Final consensus gene models were produced by integrating those disparate sources of gene structure evidence using GLEAN software (Elsik et al., 2007). Total 24,146 genes, covering 96.8% vertebrate benchmarking universal single-copy orthologs (BUSCOs) (Waterhouse et al., 2018), were predicted in the African arowana genome with average length 14911.23 bp. The length distributions of mRNA, coding sequences, exon and intron were closely similar to that of related species.

Functional annotations of the predicted genes were performed by aligning protein sequences using BLAST to KEGG release 84.0, Swissprot release 201709, Trembl release 201709 and Clusters of Orthologous Groups (COGs) database. The results show that 21,609 (89.49%) protein-coding genes were assigned successfully to at least one well-modeled functional category.

We also scanned matches of the protein sequences against the genomes of *Osteoglossidae* species (Aian arowana, African arowana and pirarucu) and detected the possible pseudogenes separately using PseudoPipe (Zhang et al., 2006) annotation tool. Pseudogenes overlapping a location of coding genes as well as those classified as fragment match were further discarded from the final annotation.

### **Evolutionary phylogeny of African arowana**

To reveal the phylogenetic relationships of African arowana and other bony fishes, gene set of

five *Clupeocephala* species (*Danio rerio*, *Salmo salar*, *Oryzias latipes*, *Gasterosteus aculeatus* and *Takifugu rubripes*), one *Elopomorpha* species (*Anguilla rostrata*) and three *Osteoglossomorpha* species (*Scleropages formosus*, *Paramormyrops kingsleyae* and *Arapaima gigas*), plus one species from *Lepisosteiformes* (*Lepisosteus oculatus*) as outgroup, were downloaded from NCBI and further used to detect gene clusters. We extract the longest transcript from unique genomic loci to eliminate redundant splicing, and retained coding sequences longer than 150 bp from each dataset to discard possibly unreliable gene predictions. We performed all-versus-all BLAST search for protein sequences of these 11 species and the resultant matches were sorted out for filtering redundant and segments, then the genes were further clustered into 23,654 families using hcluster\_sg tool (<https://sourceforge.net/p/treesoft/code/HEAD/tree/branches/lh3/>). We performed multiple sequences alignment using MUSCLE v3.7 software (Edgar, 2004) for each single-copy gene cluster and further concatenated the alignments into super-matrix. Phylogenetic relationships of these species were inferred using MrBayes v3.1.2 (Ronquist et al., 2012) based on the fourfold degenerate site of the supergene. The divergence time of our target species were also determined using MCMCTree (Yang, 2007) with the public timelines from TimeTree (Kumar et al., 2017) as calibrations. Given the phylogenetic relationship and divergence time, we analyzed the changes in gene family size using CAFE v2.1 (De Bie et al., 2006). We compared the gene pairs in the paralogous and orthologous families detected by using wgd v1.0.1 package (Zwaenepoel and Van de Peer, 2019), the distribution of synonymous mutation rate ( $K_s$ ) was used as an indicator of the duplication and divergence event in three *Osteoglossidae* species (*Scleropages formosus*, *Arapaima gigas* and *Heterotis niloticus*).

### **Evolutionary rate calculation**

The 355 11-species one-to-one gene families were firstly used to calculate evolutionary rate by using the PAML v4.4c software. For every gene families, the dN and dS of non-spotted gar genes of each lineage were extracted from the result files and used for further statistics. To perform more extensive analysis, we identified one-to-one gene families among spotted gar and three *Osteoglossidae* fishes and calculated dN and dS with PAML too. Moreover, the conserved genome regions among three *Osteoglossidae* fishes and spotted gar were identified using MultiZ v1.0 software with genome alignments between every *Osteoglossidae* fish and spotted gar. Then, the genetic distances between *Osteoglossidae* fishes and spotted gar within the conserved regions were calculated using home-made python script and TN93 algorithm (**Script 1**). Finally, we

implemented syntenic analysis between Asian arowana & African arowana, Asian arowana itself and African arowana itself with Jvarkit v0.8.12 toolkit.

### **TE insertion timeline estimation**

To detect the insertion timeline of TEs within the 3 *Osteoglossidae* fish genomes, we firstly identified the transposable elements' conserved domains using DANTE pipeline (<https://github.com/kavonrtep/dante>). Protein sequences of RT (reverse transcriptase) domains from the most abundant TE types (here LINEs and LTR/Ty3s) were extracted for each of *Osteoglossidae* species. The sequences were further aligned, together with the same type of sequences from Asian arowana's LTR/Ty1 TEs, using MAFFT v7.453 (Katoh and Standley, 2013) program for each species. Then TE element trees were built based on the multiple sequences alignment using FastTree v2.1.10 (Price et al., 2010) and re-rooted on LTR/Ty1s to trace the evolutionary trajectory of LINEs or LTR/Ty3s. Concentration of branch length between terminal leaf and root node was calculated with a home-made python script and used to imply the explosion of TE element in each species.

### **Genes and transposable elements phylogenetic trees construction**

We also investigated the evolutionary pathways of genes with similar function and repeat elements with the same class, within three *Osteoglossidae* fishes, based on the annotation results of RepeatMasker and KEGG (see Method). In this process, we used MAFFT program and FastTree software to perform the sequences alignment and tree building. All evolutionary trees were visualized using ggtree(Yu et al., 2017) package under R environment as well as the interactive online tool iTOL(Letunic and Bork, 2019). To screen and qualify gene trees with species-specific expanded clade, we traversed all nodes in a tree, by using an in-house python script (**script 2**) and ete3(Huerta-Cepas et al., 2016) module, to find out clade containing more than ten genes of which 80% were from the same species.

### **In-house Scripts**

**Script 1. Calculate the genetic distance of conserved genome regions.**

```
#!/usr/bin/env python3
```

```
import os  
import sys
```

```
from tn93 import tn93
```

```
class SEQ:
```

```
    def __init__(self, line):
        lst = line.split()
        self.source = lst[1]
        #self.name = source[0]
        #self.seqid = '.'.join(source[1:])
        self.start = int(lst[2]) + 1
        self.length = int(lst[3])
        self.strand = lst[4]
        source_length = int(lst[5])
        if self.strand == '-':
            self.end = source_length - self.start
            self.start = self.end - self.length + 1
        else:
            self.end = self.start + self.length - 1
        self.seq = lst[6].upper()
```

```
def calculate(sequences, score):
```

```
    target = sequences[0]
    length = len(target.seq)
    line = '{}-{}'.format(target.source, target.start,
                          target.end, target.strand)
    line += '\t{}\t{}'.format(length, score)
    for index, seq in enumerate(sequences[1:]):
        dist = tn93(target.seq, seq.seq, length,
                   matchMode=3, min_overlap=length // 4)
        query = '{}-{}-{}:{}'.format(seq.source, seq.start,
                                     seq.end, seq.strand, dist)
        line += ('\t' + query)
    return line + '\n'
```

```
if __name__ == '__main__':
```

```
    sys.stdout.write('#target\talign_length\tscore\tquery:dist\n')
    sequences = []
    r = open(sys.argv[1])
    for line in r:
        if line.startswith('#'):
            continue
        if line.startswith('a score='):
            score = line.strip().split('=')[1]
        if line.startswith('s '):
            sequences.append(SEQ(line))
        if line.startswith('\n'):
            info = calculate(sequences, score)
            sys.stdout.write(info)
```

```
sequences = []  
r.close()
```

## Scripts 2. Select expanded gene trees.

```
#!/usr/bin/env python3
```

```
import os  
os.environ['QT_QPA_PLATFORM'] = 'offscreen'  
import sys  
import glob  
from ete3 import Tree, TreeStyle, NodeStyle  
indir, outdir, threshold = sys.argv[1:]  
  
def standard(leaf_names):  
    if len(leaf_names) < 10:  
        return False  
    else:  
        FZ_names = [i for i in leaf_names if i.startswith('NH_')]  
        YZ_names = [i for i in leaf_names if i.startswith('XP_')]  
        if any((len(x)/len(leaf_names) >= float(threshold)) for x in [FZ_names, YZ_names]):  
            return True  
        else:  
            return False  
  
tree_dirs = glob.glob(os.path.join(indir, 'K*'))  
dirname = lambda x:os.path.basename(x)  
  
tree_files = [[dirname(x), os.path.join(x, '{}.pep.tree'.format(dirname(x)))]  
               for x in tree_dirs]  
  
pass_trees = []  
for genelD, tree_file in tree_files:  
    try:  
        tree = Tree(tree_file, format=0)  
    except:  
        sys.stderr.write('*** Parse Error: {}\n'.format(tree_file))  
        continue  
    tree.convert_to_ultrametric(strategy='cladogram')  
    tree.ladderize()  
    tag = False  
    for node in tree.traverse('levelorder'):  
        leaf_names = node.get_leaf_names()  
        if not standard(leaf_names):  
            continue  
        tag = True  
    if tag:
```



```

    pass_trees.append([geneID, tree])

if not os.path.exists(outdir):
    os.makedirs(outdir)

tree_style = TreeStyle()
tree_style.mode = 'c'
tree_style.scale = 120
tree_style.show_leaf_name = False
#tree_style.optimal_scale_level = 'full'
FZnode_style = NodeStyle()
FZnode_style['fgcolor'] = 'red'
FZnode_style['size'] = 20
FZnode_style['hz_line_width'] = 5
FZnode_style['vt_line_width'] = 5
YZnode_style = NodeStyle()
YZnode_style['fgcolor'] = 'blue'
YZnode_style['size'] = 20
YZnode_style['hz_line_width'] = 5
YZnode_style['vt_line_width'] = 5
internal_node = NodeStyle()
internal_node['size'] = 0
internal_node['hz_line_width'] = 5
internal_node['vt_line_width'] = 5

for geneID, tree in pass_trees:
    for node in tree.traverse():
        if node.is_leaf():
            if node.name.startswith('NH_'):
                node.set_style(FZnode_style)
            elif node.name.startswith('XP_'):
                node.set_style(YZnode_style)
        else:
            node.set_style(internal_node)
    tree.render(os.path.join(outdir, '{}.png'.format(geneID)), tree_style=tree_style)

```

Supplementary Figure 1. The Kmer analysis curve generated by GenomeScope (related to Figure 1).

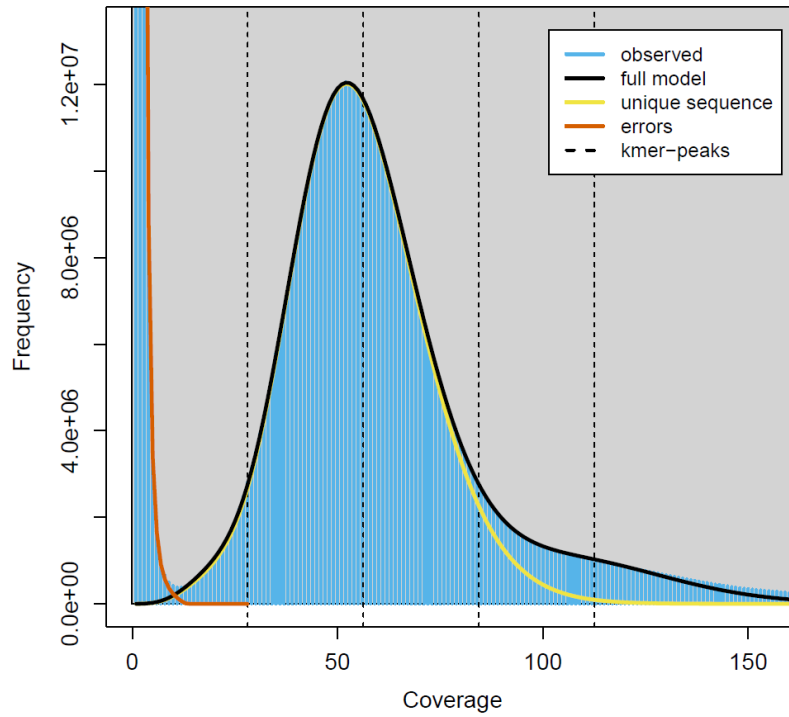

Supplementary Figure 2. The Hi-C assembly correlation heatmap (related to Figure 1).

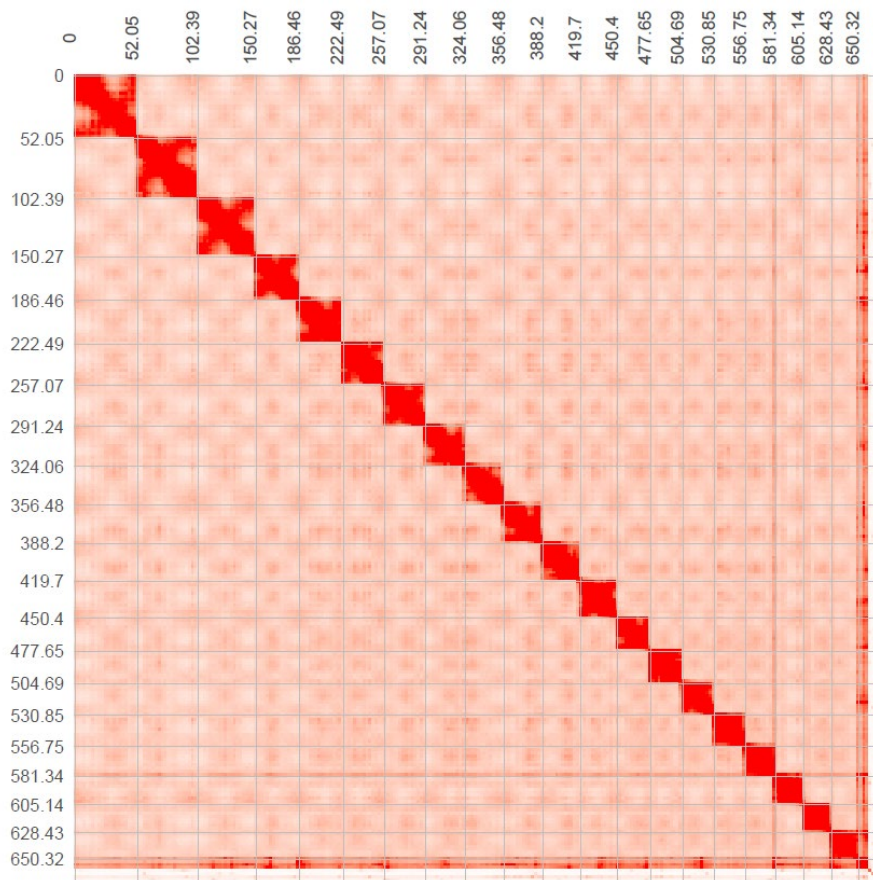

Supplementary Figure 3. The alignment spot plot of assembled and published mitochondrial genome of African arowana (related to Figure 1).

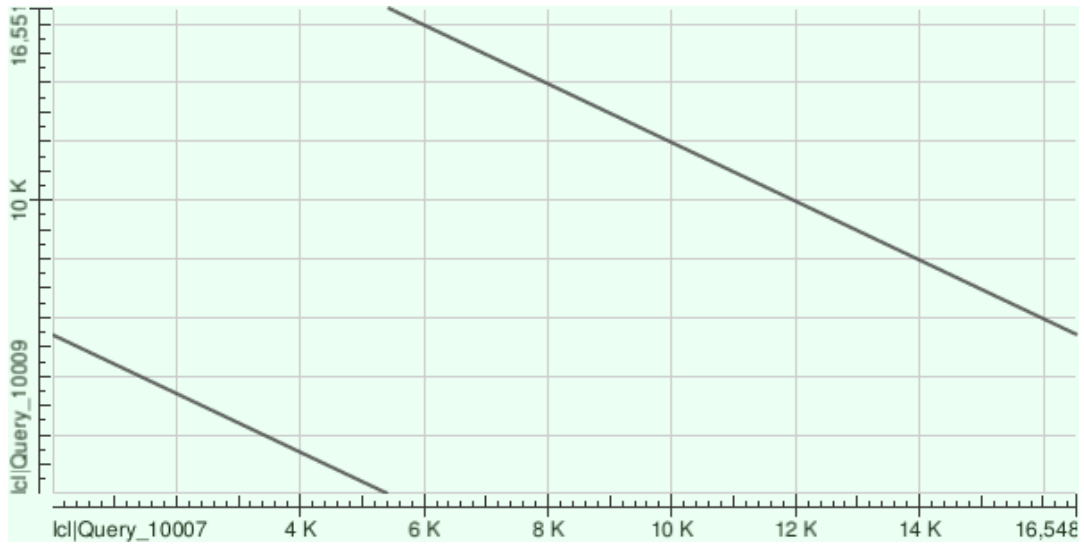

Supplementary Figure 4. The conserved regions genetic distance distribution (related to Figure 2).

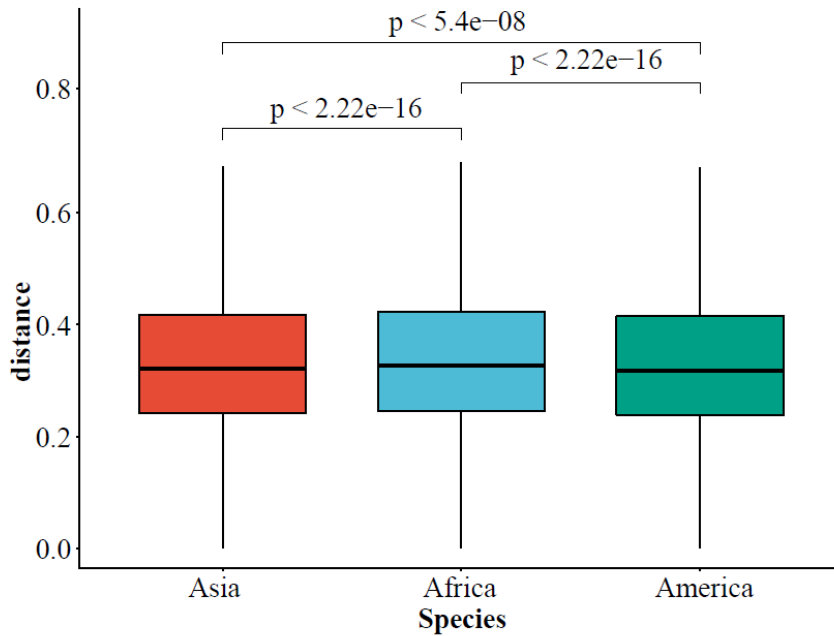

Supplementary Figure 5. The positional relationship of TEs and genes (related to Figure 3).

**K10492** (*XP\_029113551.1, XP\_029113565.1, XP\_029113577.1, XP\_029113586.1, XP\_029113603.1, XP\_029113606.1, XP\_029113677.1, XP\_029113680.1*)

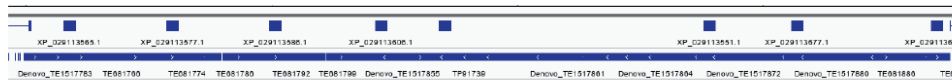

**K07418** (*XP\_029110465.1, XP\_029110466.1, XP\_029110467.1, XP\_029110475.1, XP\_029110477.1, XP\_029110479.1, XP\_029110482.1, XP\_029110484.1, XP\_029110485.1, XP\_029110486.1, XP\_029110487.1, XP\_029110491.1, XP\_029110494.1, XP\_029110495.1, XP\_029110668.1, XP\_029110669.1, XP\_029110672.1*)

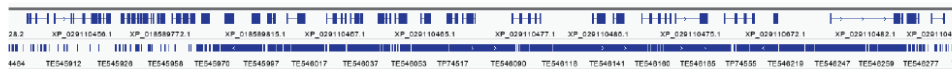

**K10798** (*XP\_029111170.1, XP\_029111360.1, XP\_029111364.1, XP\_029111367.1, XP\_029111587.1, XP\_029111590.1, XP\_029111714.1*)

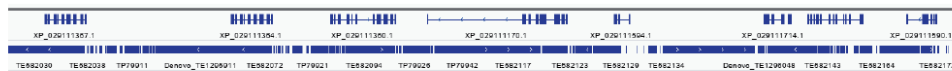

Supplementary Figure 6. Gene family expansion and contraction (related to Figure 4).

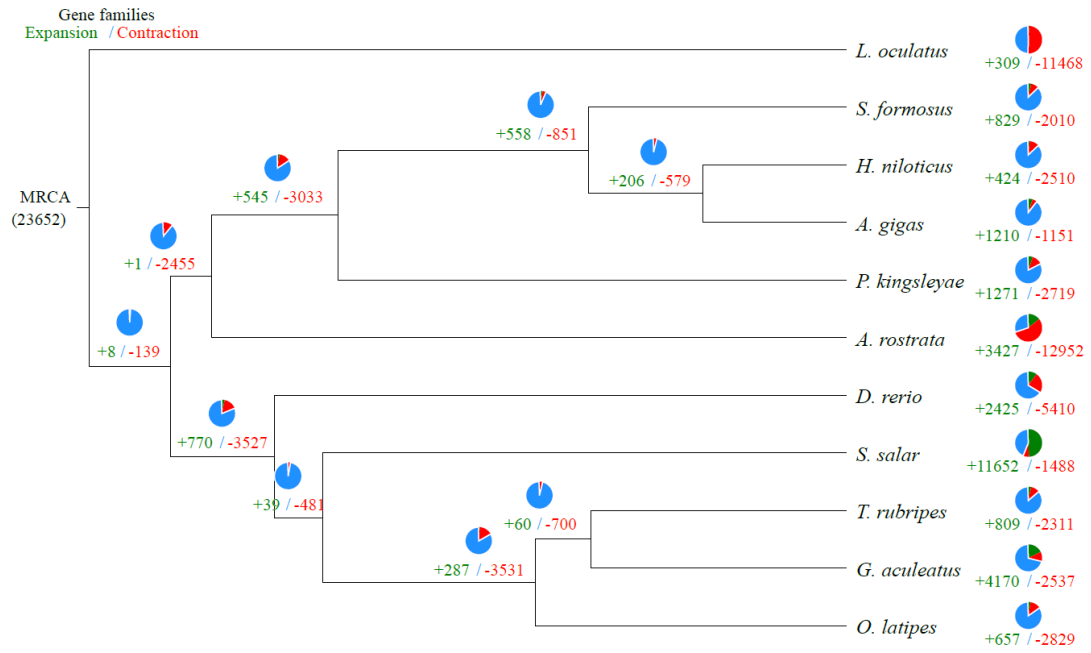

Supplementary Figure 7. 5S phylogenetic tree of three *Osteoglossidae* fishes (related to Figure 3).

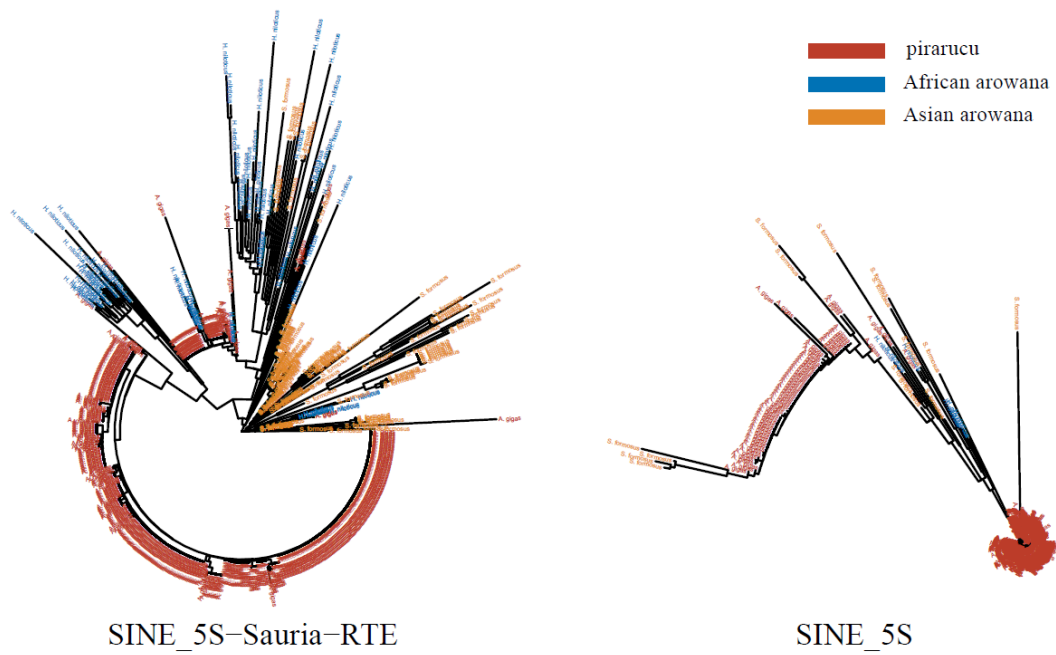

**Supplementary table 1. Sequenced data statistics (related to Figure 1).**

| Category | Bases number(bp) | genome coverage | read length |
|----------|------------------|-----------------|-------------|
| stLFR    | 144,357,156,834  | 186.42          | PE 100+140  |
| Nanopore | 10,172,388,541   | 13.14           | Mean 20,695 |
| Hi-C     | 21,234,895,000   | 27.42           | PE 100+100  |

**Supplementary table 2. Assemblies statistics (related to Figure 1).**

| #AssemblyName     | #TotalScf | #ScfLen     | #ScfN50    | #ScfN90    | #CtgNum | #CtgLen     | #CtgN50   | #CtgMax    | #GC(%) |
|-------------------|-----------|-------------|------------|------------|---------|-------------|-----------|------------|--------|
| stLFR             | 4,244     | 669,728,546 | 9,615,753  | 2,219,485  | 20,530  | 663,211,256 | 75,203    | 520,346    | 43.04  |
| Gapcloser         | 4,244     | 668,965,070 | 9,607,086  | 2,217,247  | 8,985   | 664,130,755 | 255,609   | 2,063,305  | 43.04  |
| Gapcloser_hic     | 4,031     | 669,071,570 | 32,202,068 | 23,657,292 | 8,985   | 664,130,755 | 255,609   | 2,063,305  | 43.04  |
| TGS_gapcloser     | 4,244     | 671,332,112 | 9,354,403  | 2,215,192  | 4,685   | 670,817,437 | 2,307,881 | 10,206,657 | 43.04  |
| TGS_gapcloser_hic | 3,995     | 671,456,612 | 32,427,226 | 23,803,277 | 4,685   | 670,817,437 | 2,307,881 | 10,206,657 | 43.04  |

**Supplementary table 3. Chromosome statistics (related to Figure 1).**

| Chromosome | Length     | Gene num | Gene num per Mb |
|------------|------------|----------|-----------------|
| chr1       | 51,871,654 | 1,789    | 34.49           |
| chr2       | 49,976,607 | 1,704    | 34.10           |
| chr3       | 47,507,736 | 1,693    | 35.64           |
| chr4       | 36,097,016 | 1,096    | 30.36           |
| chr5       | 35,841,748 | 1,402    | 39.12           |
| chr6       | 34,505,377 | 1,317    | 38.17           |
| chr7       | 34,149,782 | 1,158    | 33.91           |
| chr8       | 32,770,312 | 1,234    | 37.66           |
| chr9       | 32,202,068 | 1,476    | 45.84           |
| chr10      | 31,542,738 | 1,291    | 40.93           |

|       |            |       |       |
|-------|------------|-------|-------|
| chr11 | 31,366,365 | 1,152 | 36.73 |
| chr12 | 30,527,933 | 1,199 | 39.28 |
| chr13 | 27,111,882 | 1,156 | 42.64 |
| chr14 | 27,037,882 | 963   | 35.62 |
| chr15 | 25,963,407 | 952   | 36.67 |
| chr16 | 25,831,899 | 937   | 36.27 |
| chr17 | 24,583,205 | 798   | 32.46 |
| chr18 | 23,657,292 | 707   | 29.89 |
| chr19 | 23,251,436 | 783   | 33.68 |
| chr20 | 21,895,334 | 666   | 30.42 |

**Supplementary table 4. BUSCO evaluation statistics (related to Figure 1).**

|                 | Complete(C) | Complete and single-copy(S) | Complete and duplicated(D) | Fragmented(F) | Missing(M) | Total |
|-----------------|-------------|-----------------------------|----------------------------|---------------|------------|-------|
| <b>Genome</b>   | 2,522       | 2,303                       | 219                        | 33            | 31         | 2,586 |
| <b>Gene set</b> | 2,503       | 2,239                       | 264                        | 54            | 29         | 2,586 |

**Supplementary table 5. Gene orthologous statistics in public database (related to Figure 1).**

| Values            | Total  | Nr-Annotated | Swissprot-Annotated | KEGG-Annotated | TrEMBL-Annotated | Overall |
|-------------------|--------|--------------|---------------------|----------------|------------------|---------|
| <b>Number</b>     | 24,146 | 21,553       | 20,915              | 19,504         | 21,597           | 21,621  |
| <b>Percentage</b> | 100%   | 89.26%       | 86.62%              | 80.78%         | 89.44%           | 89.54%  |

**Supplementary table 6. Fossil records used for divergence time calibration (related to Figure 1).**

| Species pairs                                           | Calibration time |
|---------------------------------------------------------|------------------|
| <i>Lepisosteus oculatus</i> vs <i>Anguilla rostrata</i> | 295-334 MYA      |
| <i>Anguilla rostrate</i> vs <i>Heterotis niloticus</i>  | 244-295 MYA      |
| <i>Salmo salar</i> vs <i>Heterotis niloticus</i>        | 231-287 MYA      |

Supplementary table 7. Repeat annotation statistics (related to Figure 3).

|                     |                | Rebase TEs |         | De novo    |         | Combined TEs |         |             |         |
|---------------------|----------------|------------|---------|------------|---------|--------------|---------|-------------|---------|
|                     |                | Length     | percent | Length     | percent | Length       | percent | Length      | percent |
| <i>H. niloticus</i> | <b>DNA</b>     | 29,035,142 | 4.34    | 10,045,489 | 1.50    | 53,173,290   | 7.95    | 61,884,787  | 9.25    |
|                     | <b>LINE</b>    | 17,099,871 | 2.56    | 14,416,154 | 2.15    | 31,437,295   | 4.70    | 37,093,168  | 5.54    |
|                     | <b>SINE</b>    | 2,735,885  | 0.41    | 0          | 0.00    | 13,704,234   | 2.05    | 15,532,601  | 2.32    |
|                     | <b>LTR</b>     | 4,909,599  | 0.73    | 2,355,009  | 0.35    | 18,023,858   | 2.69    | 20,631,561  | 3.08    |
|                     | <b>Other</b>   | 43,744     | 0.01    | 0          | 0.00    | 0            | 0.00    | 43,744      | 0.01    |
|                     | <b>Unknown</b> | 0          | 0.00    | 0          | 0.00    | 17,467,985   | 2.61    | 17,467,985  | 2.61    |
|                     | <b>Total</b>   | 48,975,430 | 7.32    | 26,801,920 | 4.01    | 119,546,525  | 17.87   | 125,391,143 | 18.74   |
| <i>S. formosus</i>  | <b>DNA</b>     | 42,415,841 | 5.41    | 175,473    | 0.02    | 61,270,356   | 7.81    | 87,560,384  | 11.16   |
|                     | <b>LINE</b>    | 34,463,839 | 4.39    | 27,564,392 | 3.51    | 115,833,482  | 14.76   | 128,335,906 | 16.36   |
|                     | <b>SINE</b>    | 10,836,721 | 1.38    | 0          | 0.00    | 5,937,128    | 0.76    | 16,323,535  | 2.08    |
|                     | <b>LTR</b>     | 13,209,567 | 1.68    | 11,278,450 | 1.44    | 92,879,447   | 11.84   | 96,772,766  | 12.33   |
|                     | <b>Other</b>   | 21,115     | 0.00    | 0          | 0.00    | 0            | 0.00    | 21,115      | 0.00    |
|                     | <b>Unknown</b> | 0          | 0.00    | 0          | 0.00    | 2,261,502    | 0.29    | 2,261,502   | 0.29    |
|                     | <b>Total</b>   | 90,376,886 | 11.52   | 39,002,653 | 4.97    | 223,604,261  | 28.50   | 231,738,076 | 29.54   |
| <i>A. gigas</i>     | <b>DNA</b>     | 25,710,824 | 3.85    | 8,357,531  | 1.25    | 68,201,272   | 10.22   | 75,867,848  | 11.37   |
|                     | <b>LINE</b>    | 7,978,164  | 1.20    | 5,907,459  | 0.89    | 16,704,546   | 2.50    | 22,111,177  | 3.31    |
|                     | <b>SINE</b>    | 3,446,846  | 0.52    | 0          | 0.00    | 8,206,595    | 1.23    | 11,014,888  | 1.65    |
|                     | <b>LTR</b>     | 6,016,996  | 0.90    | 3,889,739  | 0.58    | 26,970,615   | 4.04    | 30,740,524  | 4.61    |
|                     | <b>Other</b>   | 16,768     | 0.00    | 129        | 0.00    | 0            | 0.00    | 16,897      | 0.00    |
|                     | <b>Unknown</b> | 0          | 0.00    | 0          | 0.00    | 10,605,989   | 1.59    | 10,605,989  | 1.59    |
|                     | <b>Total</b>   | 37,937,812 | 5.68    | 18,144,719 | 2.72    | 113,468,148  | 17.00   | 121,187,526 | 18.16   |

**Supplementary Table 8. Transposable elements covered genes related pathways (related to Figure 4).**

|                     | <b>#Pathway</b>                                 | <b>CovergeBigThan0.9</b> | <b>All-gene</b> | <b>Pvalue</b> | <b>Qvalue</b> |
|---------------------|-------------------------------------------------|--------------------------|-----------------|---------------|---------------|
| <i>A. gigas</i>     | NOD-like receptor signaling pathway             | 56                       | 404             | 1.31E-33      | 1.93E-31      |
|                     | Necroptosis                                     | 47                       | 349             | 1.03E-27      | 7.56E-26      |
|                     | Antigen processing and presentation             | 30                       | 151             | 4.58E-23      | 2.25E-21      |
|                     | Tight junction                                  | 39                       | 509             | 1.42E-14      | 5.21E-13      |
|                     | Salivary secretion                              | 26                       | 279             | 5.36E-12      | 1.58E-10      |
|                     | Mitophagy - animal                              | 17                       | 148             | 1.11E-09      | 2.71E-08      |
|                     | Endocytosis                                     | 32                       | 603             | 3.50E-08      | 7.35E-07      |
|                     | Longevity regulating pathway - multiple species | 15                       | 160             | 1.64E-07      | 3.02E-06      |
|                     | Spliceosome                                     | 16                       | 254             | 1.24E-05      | 1.86E-04      |
|                     | Arginine and proline metabolism                 | 9                        | 81              | 1.27E-05      | 1.86E-04      |
|                     | Estrogen signaling pathway                      | 16                       | 271             | 2.75E-05      | 3.68E-04      |
|                     | PPAR signaling pathway                          | 9                        | 132             | 0.000561226   | 6.05E-03      |
|                     | Protein processing in endoplasmic reticulum     | 15                       | 319             | 0.00057866    | 6.05E-03      |
|                     | Olfactory transduction                          | 11                       | 191             | 0.000599972   | 6.05E-03      |
|                     | MAPK signaling pathway                          | 25                       | 693             | 0.000617763   | 6.05E-03      |
|                     | Cardiac muscle contraction                      | 10                       | 164             | 0.000678535   | 6.23E-03      |
| <i>H. niloticus</i> | NOD-like receptor signaling pathway             | 12                       | 288             | 4.24E-10      | 3.18E-08      |
| <i>S. formosus</i>  | Olfactory transduction                          | 124                      | 277             | 7.43E-81      | 1.49E-78      |
|                     | NOD-like receptor signaling pathway             | 117                      | 429             | 5.45E-49      | 5.45E-47      |
|                     | Phagosome                                       | 84                       | 327             | 3.28E-33      | 2.19E-31      |
|                     | Linoleic acid metabolism                        | 31                       | 61              | 4.48E-23      | 2.24E-21      |
|                     | Ovarian steroidogenesis                         | 34                       | 113             | 1.84E-16      | 7.36E-15      |
|                     | Arachidonic acid metabolism                     | 30                       | 103             | 2.88E-14      | 9.61E-13      |



|                                                  |    |     |             |          |
|--------------------------------------------------|----|-----|-------------|----------|
| Salivary secretion                               | 46 | 254 | 1.25E-12    | 3.57E-11 |
| Necroptosis                                      | 51 | 319 | 1.03E-11    | 2.57E-10 |
| Antigen processing and presentation              | 30 | 138 | 1.02E-10    | 2.28E-09 |
| Cytokine-cytokine receptor interaction           | 50 | 402 | 9.60E-08    | 1.92E-06 |
| Aminoacyl-tRNA biosynthesis                      | 23 | 118 | 1.30E-07    | 2.37E-06 |
| Inflammatory mediator regulation of TRP channels | 33 | 237 | 1.20E-06    | 2.01E-05 |
| alpha-Linolenic acid metabolism                  | 12 | 42  | 2.01E-06    | 2.97E-05 |
| Apoptosis                                        | 38 | 300 | 2.09E-06    | 2.97E-05 |
| Neuroactive ligand-receptor interaction          | 62 | 600 | 2.23E-06    | 2.97E-05 |
| Serotonergic synapse                             | 31 | 226 | 3.45E-06    | 4.31E-05 |
| TGF-beta signaling pathway                       | 32 | 245 | 6.89E-06    | 8.10E-05 |
| Longevity regulating pathway - worm              | 25 | 170 | 8.76E-06    | 9.73E-05 |
| Gap junction                                     | 26 | 189 | 1.96E-05    | 2.06E-04 |
| Intestinal immune network for IgA production     | 18 | 109 | 3.24E-05    | 3.24E-04 |
| NF-kappa B signaling pathway                     | 27 | 224 | 0.00014015  | 1.33E-03 |
| RIG-I-like receptor signaling pathway            | 19 | 146 | 0.000504316 | 4.58E-03 |
| Ether lipid metabolism                           | 14 | 92  | 0.000562398 | 4.89E-03 |
| Mitophagy - animal                               | 18 | 140 | 0.000808824 | 6.74E-03 |

**Supplemental table 9. Unique gene families related pathways (related to Figure 4).**

|                 | #Pathway                            | unique_fam | All-gene | Pvalue   | Qvalue   |
|-----------------|-------------------------------------|------------|----------|----------|----------|
| <i>A. gigas</i> | NOD-like receptor signaling pathway | 84         | 404      | 2.44E-20 | 5.09E-18 |
|                 | Necroptosis                         | 75         | 349      | 3.72E-19 | 3.89E-17 |
|                 | Phagosome                           | 67         | 319      | 1.03E-16 | 7.19E-15 |
|                 | Tight junction                      | 88         | 509      | 6.07E-16 | 3.17E-14 |
|                 | Cell adhesion molecules (CAMs)      | 80         | 477      | 7.20E-14 | 3.01E-12 |

|                     |                                                     |    |     |             |          |
|---------------------|-----------------------------------------------------|----|-----|-------------|----------|
|                     | ECM-receptor interaction                            | 46 | 238 | 1.30E-10    | 4.52E-09 |
|                     | Mismatch repair                                     | 18 | 50  | 2.20E-09    | 5.77E-08 |
|                     | Apoptosis                                           | 56 | 349 | 2.21E-09    | 5.77E-08 |
|                     | Adherens junction                                   | 43 | 257 | 4.64E-08    | 1.08E-06 |
|                     | Gap junction                                        | 38 | 249 | 2.84E-06    | 5.93E-05 |
|                     | Focal adhesion                                      | 65 | 533 | 4.41E-06    | 8.39E-05 |
|                     | Antigen processing and presentation                 | 26 | 151 | 1.19E-05    | 2.07E-04 |
|                     | Hematopoietic cell lineage                          | 26 | 153 | 1.51E-05    | 2.43E-04 |
|                     | Carbohydrate digestion and absorption               | 15 | 83  | 0.000469753 | 7.01E-03 |
| <i>H. niloticus</i> | Ascorbate and aldarate metabolism                   | 9  | 27  | 8.02E-12    | 1.37E-09 |
|                     | Pentose and glucuronate interconversions            | 9  | 35  | 1.12E-10    | 9.57E-09 |
|                     | Drug metabolism - cytochrome P450                   | 9  | 44  | 1.03E-09    | 5.88E-08 |
|                     | Retinol metabolism                                  | 10 | 67  | 3.08E-09    | 1.32E-07 |
|                     | Steroid hormone biosynthesis                        | 9  | 55  | 8.33E-09    | 2.85E-07 |
|                     | Porphyrin and chlorophyll metabolism                | 8  | 46  | 3.48E-08    | 9.93E-07 |
|                     | Drug metabolism - other enzymes                     | 8  | 49  | 5.85E-08    | 1.25E-06 |
|                     | Metabolism of xenobiotics by cytochrome P450        | 8  | 49  | 5.85E-08    | 1.25E-06 |
| <i>S. formosus</i>  | NOD-like receptor signaling pathway                 | 67 | 429 | 1.04E-37    | 2.11E-35 |
|                     | Salivary secretion                                  | 30 | 254 | 5.43E-14    | 5.54E-12 |
|                     | Olfactory transduction                              | 26 | 277 | 4.69E-10    | 3.19E-08 |
|                     | Notch signaling pathway                             | 13 | 125 | 3.50E-06    | 1.79E-04 |
|                     | Oxidative phosphorylation                           | 14 | 174 | 2.91E-05    | 1.19E-03 |
|                     | Dorso-ventral axis formation                        | 11 | 113 | 3.67E-05    | 1.25E-03 |
|                     | Cell adhesion molecules (CAMs)                      | 23 | 416 | 4.70E-05    | 1.37E-03 |
|                     | PPAR signaling pathway                              | 11 | 124 | 8.61E-05    | 2.20E-03 |
|                     | Phenylalanine, tyrosine and tryptophan biosynthesis | 4  | 14  | 0.000186839 | 4.24E-03 |

|                          |    |     |             |          |
|--------------------------|----|-----|-------------|----------|
| Long-term potentiation   | 12 | 171 | 0.000382786 | 7.81E-03 |
| Phenylalanine metabolism | 5  | 30  | 0.000435588 | 8.08E-03 |

**Supplementary Table 10. The expanded gene families related pathways (related to Figure 4).**

|                | #Pathway                                         | Expanded gene number | All gene number | Pvalue   | Qvalue   |
|----------------|--------------------------------------------------|----------------------|-----------------|----------|----------|
| <i>A.gigas</i> | Cell adhesion molecules (CAMs)                   | 156                  | 477             | 1.12E-22 | 2.58E-20 |
|                | NOD-like receptor signaling pathway              | 130                  | 404             | 1.92E-18 | 2.21E-16 |
|                | Olfactory transduction                           | 69                   | 191             | 4.40E-13 | 3.37E-11 |
|                | Salivary secretion                               | 89                   | 279             | 7.97E-13 | 4.58E-11 |
|                | Intestinal immune network for IgA production     | 43                   | 107             | 2.24E-10 | 8.79E-09 |
|                | Antigen processing and presentation              | 54                   | 151             | 2.29E-10 | 8.79E-09 |
|                | Tight junction                                   | 128                  | 509             | 1.17E-09 | 3.85E-08 |
|                | Cardiac muscle contraction                       | 54                   | 164             | 6.92E-09 | 1.99E-07 |
|                | Necroptosis                                      | 92                   | 349             | 2.32E-08 | 5.92E-07 |
|                | Phagosome                                        | 85                   | 319             | 4.65E-08 | 1.07E-06 |
|                | Mismatch repair                                  | 23                   | 50              | 1.84E-07 | 3.86E-06 |
|                | Insulin secretion                                | 61                   | 213             | 2.47E-07 | 4.73E-06 |
|                | Gap junction                                     | 67                   | 249             | 8.08E-07 | 1.43E-05 |
|                | Adrenergic signaling in cardiomyocytes           | 95                   | 392             | 9.43E-07 | 1.55E-05 |
|                | Carbohydrate digestion and absorption            | 30                   | 83              | 1.68E-06 | 2.58E-05 |
|                | Protein digestion and absorption                 | 74                   | 290             | 1.98E-06 | 2.85E-05 |
|                | Estrogen signaling pathway                       | 66                   | 271             | 3.43E-05 | 4.64E-04 |
|                | Notch signaling pathway                          | 40                   | 146             | 8.04E-05 | 1.03E-03 |
|                | Proximal tubule bicarbonate reclamation          | 19                   | 55              | 2.58E-04 | 3.13E-03 |
|                | Inflammatory mediator regulation of TRP channels | 57                   | 243             | 3.23E-04 | 3.71E-03 |
|                | Phototransduction - fly                          | 26                   | 91              | 6.72E-04 | 7.36E-03 |

|                    |                                                 |     |     |          |          |
|--------------------|-------------------------------------------------|-----|-----|----------|----------|
| <i>H.niloticus</i> | Drug metabolism - cytochrome P450               | 14  | 44  | 3.16E-08 | 6.13E-06 |
|                    | Ascorbate and aldarate metabolism               | 10  | 27  | 6.03E-07 | 4.59E-05 |
|                    | Progesterone-mediated oocyte maturation         | 26  | 167 | 7.10E-07 | 4.59E-05 |
|                    | Drug metabolism - other enzymes                 | 13  | 49  | 1.03E-06 | 5.02E-05 |
|                    | Arginine and proline metabolism                 | 16  | 81  | 4.33E-06 | 1.68E-04 |
|                    | Retinol metabolism                              | 14  | 67  | 8.61E-06 | 2.78E-04 |
|                    | Retrograde endocannabinoid signaling            | 29  | 241 | 3.12E-05 | 8.64E-04 |
|                    | Metabolism of xenobiotics by cytochrome P450    | 11  | 49  | 3.90E-05 | 9.45E-04 |
|                    | Regulation of lipolysis in adipocytes           | 19  | 134 | 8.09E-05 | 1.74E-03 |
|                    | Necroptosis                                     | 29  | 259 | 1.15E-04 | 2.23E-03 |
|                    | Adrenergic signaling in cardiomyocytes          | 34  | 336 | 2.26E-04 | 3.99E-03 |
|                    | Selenocompound metabolism                       | 7   | 26  | 3.06E-04 | 4.38E-03 |
|                    | Gap junction                                    | 23  | 197 | 3.09E-04 | 4.38E-03 |
|                    | NOD-like receptor signaling pathway             | 30  | 288 | 3.16E-04 | 4.38E-03 |
|                    | Pentose and glucuronate interconversions        | 8   | 35  | 3.89E-04 | 5.03E-03 |
|                    | Adipocytokine signaling pathway                 | 18  | 140 | 4.26E-04 | 5.16E-03 |
|                    | Glucagon signaling pathway                      | 22  | 193 | 5.76E-04 | 6.26E-03 |
|                    | Longevity regulating pathway - multiple species | 16  | 120 | 5.81E-04 | 6.26E-03 |
|                    | Gastric acid secretion                          | 21  | 184 | 7.48E-04 | 7.64E-03 |
|                    | Bile secretion                                  | 17  | 136 | 8.40E-04 | 8.15E-03 |
|                    | MAPK signaling pathway - fly                    | 22  | 200 | 9.31E-04 | 8.60E-03 |
|                    | Cholinergic synapse                             | 25  | 241 | 1.02E-03 | 9.01E-03 |
|                    | Protein processing in endoplasmic reticulum     | 28  | 284 | 1.16E-03 | 9.80E-03 |
| <i>S.formosus</i>  | Olfactory transduction                          | 174 | 277 | 5.53E-82 | 1.27E-79 |
|                    | Phagosome                                       | 151 | 327 | 2.53E-47 | 2.90E-45 |
|                    | NOD-like receptor signaling pathway             | 159 | 429 | 2.73E-35 | 2.09E-33 |

---

|                                                  |     |     |          |          |
|--------------------------------------------------|-----|-----|----------|----------|
| Cell adhesion molecules (CAMs)                   | 140 | 416 | 2.88E-26 | 1.66E-24 |
| Linoleic acid metabolism                         | 41  | 61  | 6.95E-22 | 3.20E-20 |
| Intestinal immune network for IgA production     | 56  | 109 | 3.84E-21 | 1.47E-19 |
| Antigen processing and presentation              | 60  | 138 | 5.59E-18 | 1.84E-16 |
| Salivary secretion                               | 80  | 254 | 8.82E-14 | 2.54E-12 |
| Hematopoietic cell lineage                       | 60  | 174 | 1.51E-12 | 3.85E-11 |
| Necroptosis                                      | 90  | 319 | 3.00E-12 | 6.91E-11 |
| Arachidonic acid metabolism                      | 42  | 103 | 6.80E-12 | 1.42E-10 |
| Ovarian steroidogenesis                          | 44  | 113 | 1.40E-11 | 2.67E-10 |
| Complement and coagulation cascades              | 59  | 186 | 1.12E-10 | 1.98E-09 |
| Cytokine-cytokine receptor interaction           | 99  | 402 | 1.15E-09 | 1.90E-08 |
| Inflammatory mediator regulation of TRP channels | 67  | 237 | 1.60E-09 | 2.45E-08 |
| Phototransduction                                | 32  | 82  | 7.71E-09 | 1.11E-07 |
| TGF-beta signaling pathway                       | 66  | 245 | 1.73E-08 | 2.34E-07 |
| alpha-Linolenic acid metabolism                  | 18  | 42  | 2.96E-06 | 3.77E-05 |
| Vascular smooth muscle contraction               | 63  | 263 | 3.11E-06 | 3.77E-05 |
| Gastric acid secretion                           | 48  | 183 | 3.30E-06 | 3.80E-05 |
| Aminoacyl-tRNA biosynthesis                      | 35  | 118 | 3.67E-06 | 4.02E-05 |
| Phototransduction - fly                          | 27  | 81  | 4.18E-06 | 4.37E-05 |
| NF-kappa B signaling pathway                     | 55  | 224 | 5.89E-06 | 5.89E-05 |
| Protein digestion and absorption                 | 57  | 239 | 1.03E-05 | 9.89E-05 |
| Mineral absorption                               | 23  | 67  | 1.22E-05 | 1.12E-04 |
| GnRH signaling pathway                           | 52  | 214 | 1.43E-05 | 1.26E-04 |
| Cellular senescence                              | 72  | 338 | 4.91E-05 | 4.18E-04 |
| Gap junction                                     | 45  | 189 | 8.75E-05 | 7.18E-04 |
| RIG-I-like receptor signaling pathway            | 37  | 146 | 9.20E-05 | 7.30E-04 |

---

|                                         |    |     |          |          |
|-----------------------------------------|----|-----|----------|----------|
| Estrogen signaling pathway              | 52 | 232 | 1.39E-04 | 1.06E-03 |
| Long-term potentiation                  | 40 | 171 | 3.10E-04 | 2.30E-03 |
| Apoptosis                               | 62 | 300 | 3.74E-04 | 2.69E-03 |
| Oxytocin signaling pathway              | 69 | 347 | 5.70E-04 | 3.97E-03 |
| Bile secretion                          | 33 | 140 | 8.64E-04 | 5.84E-03 |
| Ether lipid metabolism                  | 24 | 92  | 9.52E-04 | 6.26E-03 |
| Apelin signaling pathway                | 59 | 295 | 1.19E-03 | 7.41E-03 |
| Proximal tubule bicarbonate reclamation | 15 | 48  | 1.19E-03 | 7.41E-03 |
| Neurotrophin signaling pathway          | 55 | 274 | 1.56E-03 | 9.21E-03 |
| Serotonergic synapse                    | 47 | 226 | 1.56E-03 | 9.21E-03 |

**Supplementary table 11. The contracted gene families of African arowana related pathways (related to Figure 4).**

| #Pathway                                                        | Bonytongue.Henil.contracted (757) | All-gene (19504) | Pvalue   | Qvalue |
|-----------------------------------------------------------------|-----------------------------------|------------------|----------|--------|
| <b>Olfactory transduction</b>                                   | 30                                | 150              | 1.04E-13 | 2E-11  |
| <b>Tight junction</b>                                           | 33                                | 372              | 9.48E-06 | 0.0008 |
| <b>Cellular senescence</b>                                      | 27                                | 278              | 1.22E-05 | 0.0008 |
| <b>TGF-beta signaling pathway</b>                               | 21                                | 200              | 3.54E-05 | 0.0018 |
| <b>Intestinal immune network for IgA production</b>             | 11                                | 66               | 4.28E-05 | 0.0018 |
| <b>Cell adhesion molecules (CAMs)</b>                           | 27                                | 305              | 6.23E-05 | 0.0022 |
| <b>Vitamin digestion and absorption</b>                         | 9                                 | 48               | 8.21E-05 | 0.0024 |
| <b>Cytokine-cytokine receptor interaction</b>                   | 27                                | 313              | 9.66E-05 | 0.0025 |
| <b>Signaling pathways regulating pluripotency of stem cells</b> | 25                                | 297              | 0.00025  | 0.0059 |

**Supplementary table 12. Taste receptors statistics (related to Figure 4).**

|  | <i>A. gigas</i> | <i>H. niloticus</i> | <i>S. formosus</i> |
|--|-----------------|---------------------|--------------------|
|--|-----------------|---------------------|--------------------|

|                           |   |   |   |
|---------------------------|---|---|---|
| K04624_TIR1 (Umami)       | 4 | 4 | 4 |
| K04626_TIR3 (Sweet&Umami) | 3 | 2 | 3 |
| K08474_TAS2R (Bitter)     | 3 | 4 | 2 |
| K04990_PKD2L1 (Sour)      | 1 | 1 | 1 |
| K04824_SCNN1A (Salty)     | 1 | 1 | 1 |

Supplementary table 13. Odorant receptors statistics (related to Figure 4).

|            | <i>A. gigas</i> | <i>H. niloticus</i> | <i>S. formosus</i> |
|------------|-----------------|---------------------|--------------------|
| K04257_OR  | 70              | 45                  | 160                |
| K04614_V1R | 14              | 15                  | 14                 |
| K04613_V2R | 2               | 2                   | 1                  |

## Reference

- Benson, G. (1999). Tandem repeats finder: a program to analyze DNA sequences. *Nucleic Acids Res* *27*, 573-580.
- Birney, E., Clamp, M., and Durbin, R. (2004). GeneWise and Genomewise. *Genome Res* *14*, 988-995.
- Burge, C., and Karlin, S. (1997). Prediction of complete gene structures in human genomic DNA. *J Mol Biol* *268*, 78-94.
- De Bie, T., Cristianini, N., Demuth, J.P., and Hahn, M.W. (2006). CAFE: a computational tool for the study of gene family evolution. *Bioinformatics* *22*, 1269-1271.
- Dudchenko, O., Batra, S.S., Omer, A.D., Nyquist, S.K., Hoeger, M., Durand, N.C., Shamim, M.S., Machol, I., Lander, E.S., Aiden, A.P., *et al.* (2017). De novo assembly of the *Aedes aegypti* genome using Hi-C yields chromosome-length scaffolds. *Science* *356*, 92-95.
- Durand, N.C., Robinson, J.T., Shamim, M.S., Machol, I., Mesirov, J.P., Lander, E.S., and Aiden, E.L. (2016a). Juicebox Provides a Visualization System for Hi-C Contact Maps with Unlimited Zoom. *Cell Syst* *3*, 99-101.
- Durand, N.C., Shamim, M.S., Machol, I., Rao, S.S., Huntley, M.H., Lander, E.S., and Aiden, E.L. (2016b). Juicer Provides a One-Click System for Analyzing Loop-Resolution Hi-C Experiments. *Cell Syst* *3*, 95-98.
- Edgar, R.C. (2004). MUSCLE: multiple sequence alignment with high accuracy and high throughput. *Nucleic Acids Res* *32*, 1792-1797.
- Elsik, C.G., Mackey, A.J., Reese, J.T., Milshina, N.V., Roos, D.S., and Weinstock, G.M. (2007). Creating a honey bee consensus gene set. *Genome Biol* *8*, R13. doi: 10.1186/gb-2007-8-1-r13
- Huerta-Cepas, J., Serra, F., and Bork, P. (2016). ETE 3: Reconstruction, Analysis, and Visualization of Phylogenomic Data. *Mol Biol Evol* *33*, 1635-1638.
- Katoh, K., and Standley, D.M. (2013). MAFFT multiple sequence alignment software version 7: improvements in performance and usability. *Mol Biol Evol* *30*, 772-780.
- Kim, D., Paggi, J.M., Park, C., Bennett, C., and Salzberg, S.L. (2019). Graph-based genome alignment and genotyping with HISAT2 and HISAT-genotype. *Nat Biotechnol* *37*, 907-915.
- Kumar, S., Stecher, G., Suleski, M., and Hedges, S.B. (2017). TimeTree: A Resource for Timelines, Timetrees, and Divergence Times. *Mol Biol Evol* *34*, 1812-1819.
- Letunic, I., and Bork, P. (2019). Interactive Tree Of Life (iTOL) v4: recent updates and new developments. *Nucleic Acids Res* *47*, W256-W259.
- Luo, R., Liu, B., Xie, Y., Li, Z., Huang, W., Yuan, J., He, G., Chen, Y., Pan, Q., Liu, Y., *et al.* (2012). SOAPdenovo2: an empirically improved memory-efficient short-read de novo assembler. *Gigascience* *1*, 18. doi: 10.1186/2047-217X-1-18
- Majoros, W.H., Pertea, M., and Salzberg, S.L. (2004). TigrScan and GlimmerHMM: two open source ab initio eukaryotic gene-finders. *Bioinformatics* *20*, 2878-2879.
- Marcais, G., and Kingsford, C. (2011). A fast, lock-free approach for efficient parallel counting of occurrences of k-mers. *Bioinformatics* *27*, 764-770.
- Price, M.N., Dehal, P.S., and Arkin, A.P. (2010). FastTree 2--approximately maximum-likelihood trees for large alignments. *PLoS One* *5*, e9490. doi: 10.1371/journal.pone.0009490
- Ronquist, F., Teslenko, M., van der Mark, P., Ayres, D.L., Darling, A., Höhna, S., Larget, B., Liu, L., Suchard, M.A., and Huelsenbeck, J.P. (2012). MrBayes 3.2: efficient Bayesian phylogenetic inference and model choice across a large model space. *Syst Biol* *61*, 539-542.



Servant, N., Varoquaux, N., Lajoie, B.R., Viara, E., Chen, C.J., Vert, J.P., Heard, E., Dekker, J., and Barillot, E. (2015). HiC-Pro: an optimized and flexible pipeline for Hi-C data processing. *Genome Biol* *16*, 259. doi: 10.1186/s13059-015-0831-x

Stanke, M., Keller, O., Gunduz, I., Hayes, A., Waack, S., and Morgenstern, B. (2006). AUGUSTUS: ab initio prediction of alternative transcripts. *Nucleic Acids Res* *34*, W435-439.

Vurture, G.W., Sedlazeck, F.J., Nattestad, M., Underwood, C.J., Fang, H., Gurtowski, J., and Schatz, M.C. (2017). GenomeScope: fast reference-free genome profiling from short reads. *Bioinformatics* *33*, 2202-2204.

Wang, O., Chin, R., Cheng, X., Wu, M.K.Y., Mao, Q., Tang, J., Sun, Y., Anderson, E., Lam, H.K., Chen, D., *et al.* (2019). Efficient and unique cobarcoding of second-generation sequencing reads from long DNA molecules enabling cost-effective and accurate sequencing, haplotyping, and de novo assembly. *Genome Res* *29*, 798-808.

Waterhouse, R.M., Seppey, M., Simao, F.A., Manni, M., Ioannidis, P., Klioutchnikov, G., Kriventseva, E.V., and Zdobnov, E.M. (2018). BUSCO Applications from Quality Assessments to Gene Prediction and Phylogenomics. *Mol Biol Evol* *35*, 543-548.

Weisenfeld, N.I., Kumar, V., Shah, P., Church, D.M., and Jaffe, D.B. (2017). Direct determination of diploid genome sequences. *Genome Res* *27*, 757-767.

Xu, M., Guo, L., Gu, S., Wang, O., Zhang, R., Fan, G., Xu, X., Deng, L., and Liu, X. (2019). TGS-GapCloser: fast and accurately passing through the Bermuda in large genome using error-prone third-generation long reads. *bioRxiv*. doi: 10.1101/831248

Xu, Z., and Wang, H. (2007). LTR\_FINDER: an efficient tool for the prediction of full-length LTR retrotransposons. *Nucleic Acids Res* *35*, W265-268.

Yang, Z. (2007). PAML 4: phylogenetic analysis by maximum likelihood. *Mol Biol Evol* *24*, 1586-1591.

Yu, G., Smith, D.K., Zhu, H., Guan, Y., Lam, T.T.-Y., and McInerney, G. (2017). ggtree: anrpackage for visualization and annotation of phylogenetic trees with their covariates and other associated data. *Methods in Ecology and Evolution* *8*, 28-36.

Zhang, Z., Carriero, N., Zheng, D., Karro, J., Harrison, P.M., and Gerstein, M. (2006). PseudoPipe: an automated pseudogene identification pipeline. *Bioinformatics* *22*, 1437-1439.

Zwaenepoel, A., and Van de Peer, Y. (2019). wgd-simple command line tools for the analysis of ancient whole-genome duplications. *Bioinformatics* *35*, 2153-2155.
